# Supplementary material for: Acetylation of XPF by TIP60 facilitates XPF-ERCC1 complex assembly and activation
Source: PubMed Central journal article supplement (PMC7005904; doi:10.1038/s41467-020-14564-x), 2020-02-07
Supplement: 41467_2020_14564_MOESM2_ESM.pdf [file 41467_2020_14564_MOESM2_ESM.pdf]

## **Description of Additional Supplementary Files**

File Name: Supplementary Data 1

Description: Mass spectrometry analysis of TIP60 TAP products.

File Name: Supplementary Data 2

Description: Mass spectrometry analysis of XPF TAP products.
